# Supplementary material
Source: publisher site journal article supplement (https://www.spandidos-publications.com/2988/downloadSupplementary)

Figure S1. Autophagy was inhibited by ATG5 knock-down using siATG5 tools. (A) Western blot analysis for ATG5, p62, and LC3B protein expression in neuroblastoma cells (SK-N-SH).  $\beta$ -actin was applied as a loading control. (B) Bar graph representing the average ATG5, LC3B-II protein expression levels. Expression data were normalized to  $\beta$ -actin expression. Expression levels were evaluated by quantifying the protein bands, depicted by densitometric values beside the blot. Values represent the mean  $\pm$  SD (n=5). \*\*\*P<0.001 vs. control. NC, negative control; siATG5, ATG5 small-interfering RNA; adj. volume, adjusted volume (band volume minus background volume).

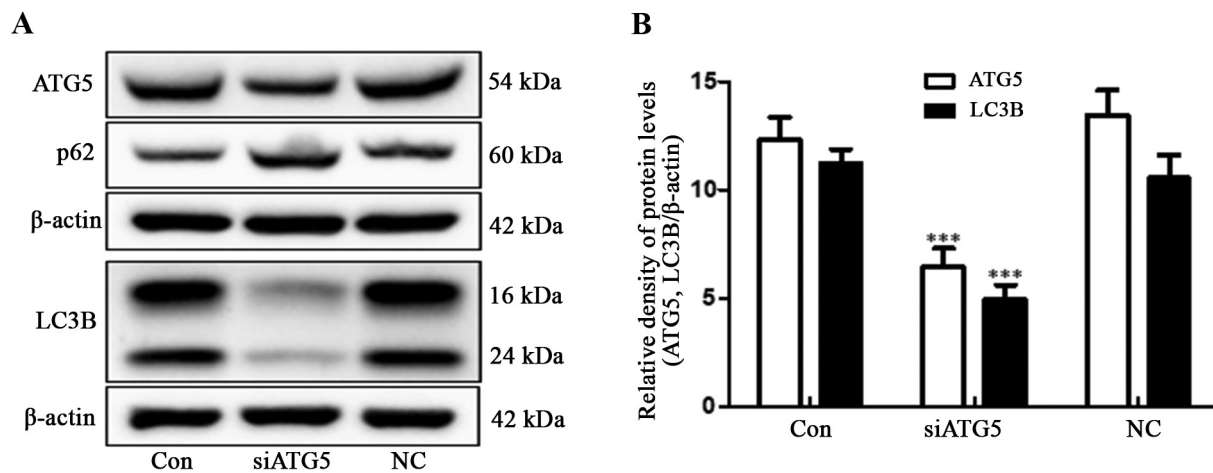

Supplement: Supplementary file 1 [file downloadSupplementary]
